# Supplementary material for: Mechanism for Collective Cell Alignment in Myxococcus xanthus Bacteria
Source: PubMed Central journal article supplement (PMC4550276; doi:10.1371/journal.pcbi.1004474), 2015-08-26

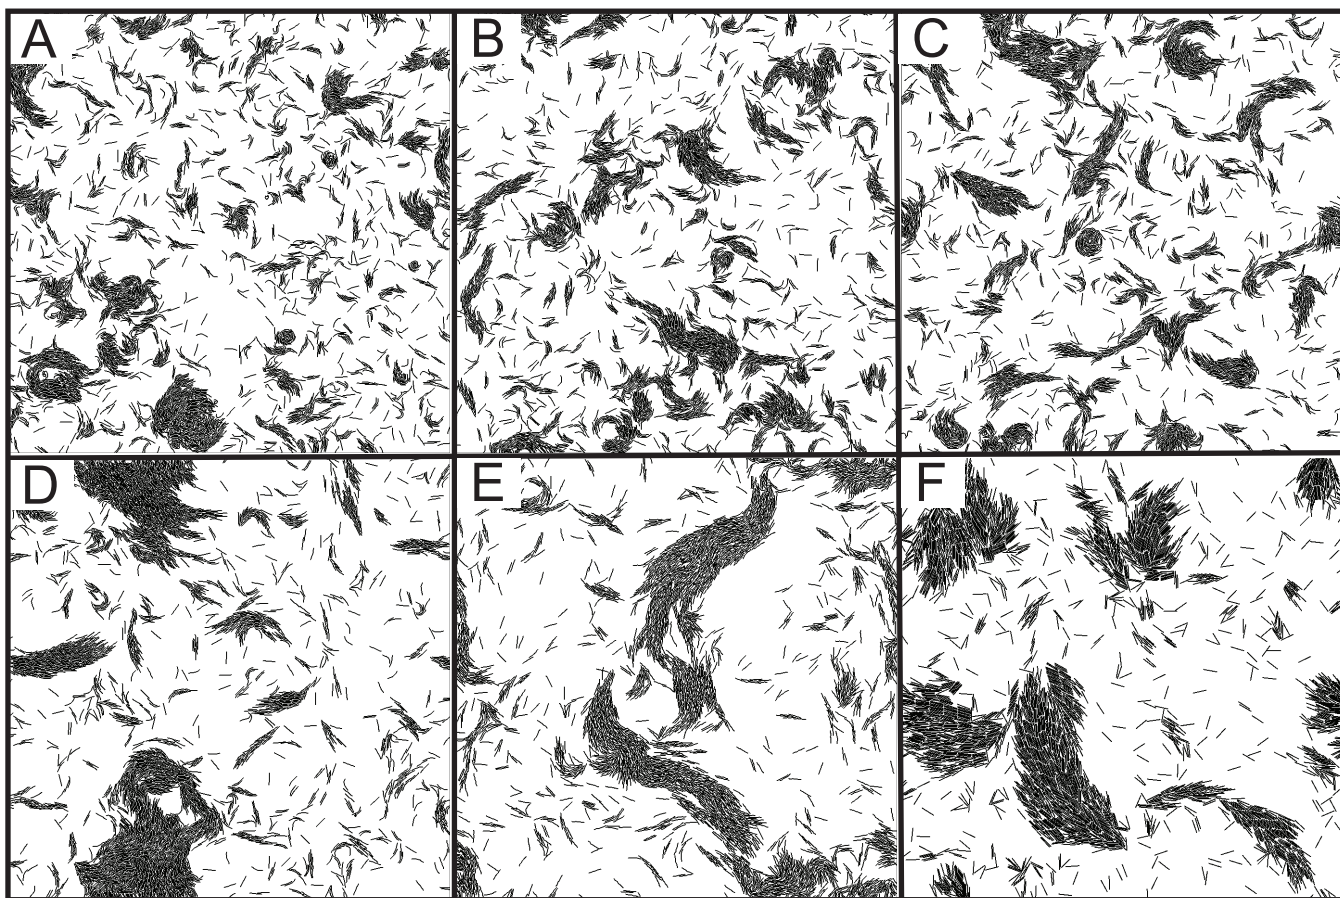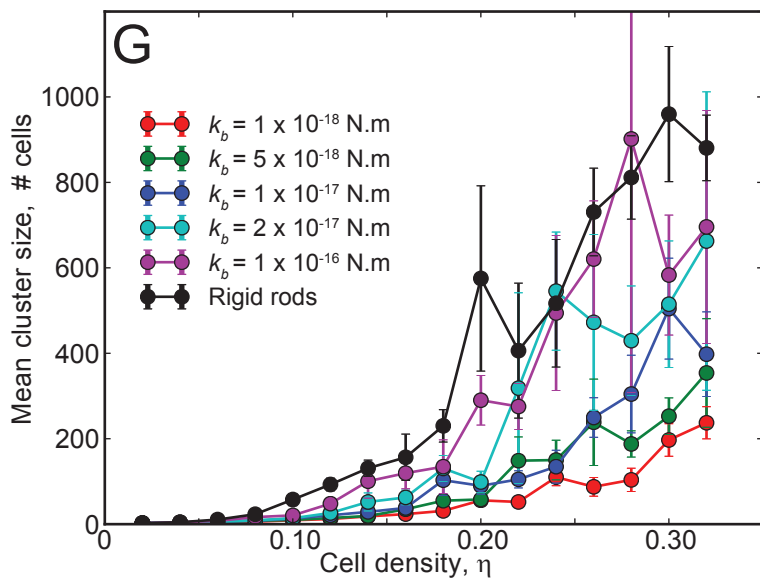

Supplement: pcbi.1004474.s004.pdf [file pcbi.1004474.s004.pdf]
